# Supplementary material
Source: Frontiers journal article supplement (https://www.frontiersin.org/articles/490241)
Supplement: Table_1.docx [file Table_1.docx]

In Alphabetical order

| **Working Group Members** | **Name and** | **Surname** | **Qualifications** | **Expertise** | **Email address** | **Affiliation** |
| --- | --- | --- | --- | --- | --- | --- |
| Facilitator | Omar | Abidi | PhD Human genetics | Human genetics & molecular biology Education and Research; Coordinator of Master in Pedagogy of Nursing Sciences and Health Techniques | abidi.or@gmail.com | Institut Supérieur des professions Infirmières et Techniques de Santé (ISPITS) de Casablanca, Morocco |
| Facilitator | MB | Akanle | B.ENG, MICT | BigData, Machine learning, Cloud Computing, Bioinformatics and Data communication | bola.akanle@covenantuniversity.edu.ng | Covenant University Bioinformatics Research (CUBRe), Nigeria |
| WG Member, Planner, Advisor | Stuart Alvaro | Ali | PhD, FIBMS, FRSPH | Genetic testing, epidemiology, | stuart.ali@wits.ac.za | Precision Medicine for Africa - A Division of the Wits Health Consortium, University of the Witwatersrand Johannesburg, Republic of South Africa |
| Facilitator | Cliff Asher | Aliga | MSc Emerg. & Crit Nurse, BSN, PhD Candidate | Emergency and Critical Care Nurse Specialist | cliff.aliga@gmail.com | Aga Khan UNiversity, Uganda |
| Planning Team | Kuda | Majada |  | Nurse | kudabango@yahoo.com | The School of Nursing, University of Western Cape, Cape Town, South Africa |
| Coordinator | Paballo | Chauke | Msc Biodiversity, Conservation and Managenent  BSocSc(Hons)Environemental and Geographical Science | Bioinformatics Training and Outreach Coordinator  Bioinformatics education and curriculum development, Bioinformatics  Climate Change, Biodiversity Conservation, Social Research, Facilitation and Lecturing | paballo.chauke@uct.ac.za | H3ABioNet, University of Cape Town |
| Planning Team | Minnet | Cotzee |  | Professor in Nursing | minette.coetzee@uct.ac.za | Child Nurse Practice Development Initiative, Department of Paediatrics and Child Health, Faculty of Health Sciences, University of Cape Town, Cape Town, South Africa. |
| Trainer, WG member | Collet | Dandara | BSc, BSc(Hons), PhD | Pharmacogenomics, Drug metabolism, Human Genetics, Genomics, epigenetics and tissue culture | [collet.dandara@uct.ac.za](mailto:collet.dandara@uct.ac.za) | Pharmacogenomics & Drug Metabolism Research Group, Division of Human Genetics, Department of Pathology & Institute of Infectious Disease and Molecular Medicine, University of Cape Town |
| Planning Team, Facilitator, Trainer | Faisal M. | Fadlelmola | PhD (Human Molecular Genetics & Bioinformatics) | Molecular Biology, Genetics, Genomics, Bioinformatics and Information Technology | faisal.mohamed@hotmail.com | Centre for Bioinformatics & Systems Biology, Faculty of Science, University of Khartoum, P.o. Box 321 Khartoum, Sudan |
| Facilitator | Michael B. | Fawale | MBBS, MSc Pharmacology, FMCP (neurology) | Clinical Neurology,  Stroke genetics,  Epilepsy  Epidemiology of sleep disorders | bimbofawale@live.com | Obafemi Awolowo University, Ile-Ife, Nigeria |
| Planning Team, Advisor | Pedro L. | Fernandes |  | BioinformaticsTraining | pfern@igc.gulbenkian.pt | Instituto Gulbenkian de Ciência, Oeiras, Portugal |
| Trainer, WG Member | Anita | Ghansah | PhD Genetic Epidemiology | Molecular Biology, Genetics Molecular/genomic epidemiology | aghansah2013@gmail.com | Noguchi Memorial Institute for Medical Research, University of Ghana, Legon-Ghana |
| Facilitator | Karen | Kengne Kamga | MD | Physician, genetic counselling | kkarenke@yahoo.co.uk | Department of pathology, division of human genetics, University of Capetown |
| Facilitator | Zainab Abimbola | Kashim | B.Sc., M.Sc. (Microbiology)  M.Sc. (Environmental Science) | Microbiology, Bioinformatics | bimski4real@gmail.com | National Biotechnology Development Agency, Abuja, Nigeria |
| Planning Team,Trainer, Lecturer | Samar Kamal | Kassim | MD, PhD Medical Biochemistry and Molecular Biology,  Diploma Clinical Nutrition | Medical Biochemistry, Molecular Biology, Genomics, Bioinformatics Education, Clinical Nutrition | samar_kassim@med.asu.ed.eg | Faculty of Medicine, Ain Shams University, Cairo, Egypt |
| Facilitator | Morenikeji A. | Komolafe | MBBS, Dip. Clin Neurology, FWACP | Genetics, Epilepsy, Parkinson’s Disease, Sleep Disorders. | adeyoyin2001@yahoo.com | Obafemi Awolowo University, Ile-Ife, Nigeria |
| Trainer | Guida | Landouré | MD, PhD | Human genetics, Neurogenetics | guida@icermali.org | Université des Sciences, des Techniques et des Technologies de Bamako, Mali |
| Planning Team | Cordelia | Leisegang | B.Nurs., M.Nurs. (Nursing) | Clinical trials, online learning/training and leadership | cordelia.leisegang@outlook.com | Global Research Nurses  University of Cape Town/Private |
| Planning team, WG member,Advisor | Ebony B | Madden | B.S. Biology, M.S. Genetic Counseling, Ph.D. Genetics and Human Genetics | Genetic epidemiology, genomic medicine, population genetics, health disparities | ebony.madden@nih.gov | Division of Genomic Medicine, National Human Genome Research Institute, National Institutes of Health |
| Planning Team | Kuda | Majada |  | General Nurse | kudabango@yahoo.com | The School of Nursing, University of Western Cape, |
| Coordinator | Malebo | Malope | BSc. Medical Sciences, MSc (Med) Genetic Counselling | Genetic Counsellor, Serious Congenital Abnormalities and Termination of Pregnancy | mlpmal005@myuct.ac.za | Department of Pathology, Division of Human Genetics, University of Cape Town, South Africa |
| Trainer/ WG | Kaba | Mamadou | MD, PhD | Microbiomics;  Infectious Diseases;  Medical Microbiology;  Medical Virology | mamadou.kaba@hotmail.com | Division of Medical Microbiology, Department of Pathology, Faculty of Health Sciences, University of Cape Town, Cape Town, South Africa.  Institute of Infectious Disease and Molecular Medicine, University of Cape Town, Cape Town, South Africa |
| Facilitator | Keofentse | Mathuba |  | Registered Nurse/Midwife | kmathuba@baylorbotswana.org.bw | Botswana-Baylor Children's Clinical Center of Excellence, Gaborone, Botswana |
| Trainer, Planning Team | Alice | Matimba |  | Pharmacogenomics, Training | alice.matimba@wellcomegenomecampus.ac.uk | Advanced Courses and Scientific Conferences, Wellcome Genome Campus, Hunxton, UK |
| Trainer | Tracy L. | Meiring |  | Medical Virology and Microbiomes | tracy.meiring@gmail.com | Division of Medical Virology, Department of Pathology, Faculty of Health Sciences, University of Cape Town, Cape Town, South Africa. |
| Facilitator | George | Mochamah | MSc. Clinical trials | Clinical trials | gmochamah@kemri-wellcome.org | KEMRI-wellcome Trust, Kilifi |
| Advisor | Sarah L | Morgan | BSc(Hons), MSc, MA, PhD (Tumour Diagnostics) | Programme and curriculum development (both training and higher education), trainer development, competency assessment, Molecular Biology, Ethics | sarahm@ebi.ac.uk | Training team, EMBL-European Bioinformatics Institute, Hinxton, UK |
| Planning Team, Trainer | Nicola | Mulder | PhD Medical Microbiology | Bioinformatics education and curriculum development, Bioinformatics, Genomics | nicola.mulder@uct.ac.za | Computational Biology Division, Department of Integrative Biomedical Sciences, IDM, University of Cape Town, Cape Town, South Africa |
| Planning Team, WG Member | Nash | Oyekanmi |  | Genomics,  Bioinformatics | oyekan.nash@gmail.com | Centre for Genomics Research and Innovation, National Biotechnology Development Agency, Abuja, Nigeria |
| Trainer, WG member | Nchangwi S | Munung | M.Sc Med  M.Sc Biochemistry | Bioethics | nchangwisyntia@yahoo.com | Division of Human Genetics and Institute of Infectious Diseases and Molecular Medicine,  Faculty of Health Sciences, University of Cape Town, Cape Town, South Africa |
| Coordinator, Trainer | Victoria | Nembaware |  | Bioinformatics, Genomics, Training, Capacity Building | vnembaware@gmail.com | Division of Human Genetics and Institute of Infectious Diseases and Molecular Medicine,  Faculty of Health Sciences, University of Cape Town, Cape Town, South Africa. |
| Facilitator | Temitope Esther | Owoeye |  | Molecular  Biology,  Genetics and  Genomics | topmost0504@yahoo.com | National Biotechnology Development Agency, South-West Centre, Ibadan, Nigeria |
| Planning Team, Working Group, Trainer | Michael Sean | Pepper | MBChB, PhD, MD, PD | Genomics, cell and gene therapy | michael.pepper@up.ac.za | Institute for Cellular and Molecular Medicine, Faculty of Health Sciences, University of Pretoria |
| Advisor | Lunelle | Pienaar |  | Staff development and curriculum development | lunelle.pienaar@uct.ac.za | Department of Health Sciences Education UCT |
| Trainer | Elize | Pietersen | PhD (Med) | Clinical health research | elize.pietersen@gmail.com | University of Cape Town / Private |
| Planning Team, WG member, Facilitator | Fouzia | Radouani | PhD (Immunology) | PhD Immunology; Research in Infectious diseases & public health problems; Molecular biology; Genomics and genetics; Bioinformatics (tools & database development, data analysis) | radouani@gmail.com | Chlamydiae and Mycoplasmas Laboratory, Institut Pasteur du Maroc, Morocco |
| Planning Team, Working Group Member | Raj | S Ramesar |  | Human Genetics | raj.ramesar@uct.ac.za | MRC Genomic and Precision Medicine Research Unit, Division of Human Genetics, University of Cape Town |
| Planning Team, WG Member | Michelle | Skelton |  | Human Genetics | michelle.skelton@uct.ac.za | H3Africa Administrative Coordinating Centre University Of Cape Town, South Africa |
| WG member, Facilitator | Sununguko Wata | Mpoloka |  | Molecular Biology,  Population Genetics | mpoloka@ub.ac.bw | Department of Biological Sciences, University of Botswana (and CAfGEN) |
| WG Member | Wayengerera | Misaki | MD, PhD | Human Genetics & Genomics | waymisaki@gmail.com | Department of Medical Microbiology, College of Health Sciences, Makerere University, Kampala, Uganda |
| WG Member | Ambroise | Wonkam | MD, PhD | Genetic medicine  Human Genetics  Medical Ethics | ambroise.wonkam@uct.ac.za | Division of Human Genetics and Institute of Infectious Diseases and Molecular Medicine,  Faculty of Health Sciences, University of Cape Town, Cape Town, South Africa |
| Facilitator, Trainer | Adetunji  Samuel | Adesina | MSc (Biochemistry and Molecular Biology) | Molecular Biology and Bioinformatics | asadesina@yahoo.com | Department of Biochemistry and Molecular Biology, Obafemi Awolowo University, Ile-Ife, Nigeria. |
| Trainer | Tina-Marié | Wessels | MSc(Med) Genetic Counselling (PhD) | Genetic Counsellor  Training | tina.wessels@uct.ac.za | Division Human Genetic Genetics, Department of Pathology, University of Cape Town |
